# Supplementary material for: Membrane estrogen receptor α signaling modulates the sensitivity to estradiol treatment in a dose- and tissue- dependent manner
Source: PubMed Central journal article supplement (PMC10239518; doi:10.1038/s41598-023-36146-9), 2023-06-03
Supplement: 41598_2023_36146_MOESM1_ESM.pdf [file 41598_2023_36146_MOESM1_ESM.pdf]

## Membrane estrogen receptor $\alpha$ signaling modulates the sensitivity to estradiol treatment in a dose- and tissue- dependent manner

Yiwen Jiang<sup>1#</sup>, Karin Horkeby<sup>1#\*</sup>, Petra Henning<sup>1</sup>, Jianyao Wu<sup>1</sup>, Lina Lawenius<sup>1</sup>, Cecilia Engdahl<sup>1,3</sup>, Priti Gupta<sup>1,3</sup>, Sofia Movérare-Skrtic<sup>1</sup>, Karin H Nilsson<sup>1</sup>, Ellis Levin<sup>4</sup>, Claes Ohlsson<sup>1,2</sup>, Marie K Lagerquist<sup>1</sup>

**Supplementary Table 1.** Stable serum E2 levels in high-dose E2 treated groups throughout the experiment.

| Timepoint | WT-E2         | C451A-E2     | Šídák's multiple comparisons test |
|-----------|---------------|--------------|-----------------------------------|
| 1-week    | 184±13 (n=6)  | 193±29 (n=5) | ns                                |
| 2-week    | 226±20 (n=5)  | 330±32 (n=3) | ns                                |
| 3-week    | 260±33 (n=10) | 209±34 (n=8) | ns                                |

(Two-way ANOVA analysis: interaction: ns; timepoint: ns; genotype: ns)

Ovariectomized WT and C451A females were treated with 17beta-estradiol (E2) of 6  $\mu\text{g}/\text{mouse}/\text{day}$  for three weeks. Serum samples were taken after 1-week, 2-week and 3-week of treatment, and serum E2 levels were measured by LC-MS. Two-way ANOVA followed by Šídák's multiple comparisons test was applied for analysis. All values are presented as mean  $\pm$  SEM. ns; not significant.
